# Supplementary material for: ­Reproductive strategies of two common sympatric Mediterranean sponges: Dysidea avara (Dictyoceratida) and Phorbas tenacior (Poecilosclerida)
Source: PeerJ. 2018 Aug 9;6:e5458. doi: 10.7717/peerj.5458 (PMC6087620; doi:10.7717/peerj.5458)
Supplement: Table S1 — Percentage of individuals in reproduction (%), Relative area of the sponge sections occupied by reproductive elements (%), number of reproductive elements per surface area (number/mm2), diameter of reproductive elements (µm). [file peerj-06-5458-s003.xlsx]

## Sheet: Dysidea avara
Month	N	ind in repro	n oocy/mm2	Inv oocy %	diam oocy (µm)	n embry/mm2	Inv embry %	diam embry (µm)	n larva/mm2	Inv larva %	diam larva (µm)		Month	N for diametre
Mar2009	30	0												oocyte	embryo	larvae
Apr	30	1	1.02482	0.0110747	12.5	14.1026	5.40498	96.0909					Apr09	7	50
		2	0.641026	0.1334	95	7.69231	4.39083	109.667					May	42	30
		3	0.641026	0.203725	76	12.8205	5.35957	86.2					Jun	57	39	19
		4	0.512821	0.130843	83	1.7094	3.61225	226					Jul		8	10
		5	0.512821	0.147797	91	8.97436	2.62826	70.4667					Aug
		6	0.512821	0.165477	96	1.28205	2.78882	277					Sep
		7				12.8205	3.50828	69.4					Oct
		8				2.5641	1.51543	139					Nov
		9				2.5641	1.3483	100.5					Dec
		10				7.69231	1.36501	67.3333					Jan2010
		11				2.5641	2.64002	162					Feb
		12				2.5641	1.30105	189					Mar
May	30	1	5.12821	0.0368487	8.375	7.69231	5.87243	109.333					Apr	7
		2	3.20513	0.0346337	11.2	2.5641	4.43213	181.8					May	91	18
		3	5.12821	0.0671532	13.25	3.4188	3.67523	127.175					Jun	41	20	5
		4	2.5641	0.0335766	13.25	3.20513	3.57545	133.68					Jul	20	19	57
		5	2.5641	0.0335766	13.25	2.5641	3.00236	154.5					Aug
		6	2.5641	0.0341807	13.25	5.12821	6.1493	146.5					Sep
		7	1.92308	0.0269318	13.6667	2.5641	2.36785	115.667					Oct
		8	2.5641	1	15	3.84615	2.52867	130					Nov
		9	1.28205	0.113264	15	2.5641	1.68749	151					Dec
		10	5.12821	0.0679587	15	2.5641	2.87494	192.5					Jan2011
		11				5.12821	5.03921	129.5					Feb
		12				2.5641	2.78198	142.5					Mar
Jun	25	1	22.2222	0.314368	13.8008
		2	71.7949	0.663881	13.9643	0.641026	2.11425	258.3
		3	3.4188	0.411376	55.5	3.20513	11.2748	278.59
		4				5.12821	12.433	247.97
		5				2.5641	9.65467	293.1
		6				5.12821	10.438	253.833	2.5641	9.29972	257.333
		7							3.4188	15.5164	266.75
		8							5.12821	12.7674	323.5
		9							2.5641	12.6996	303.5
		10							5.12821	18.9136	262.5
		11							3.84615	14.4433	267.25
Jul	26	1				2.10526	10.2243	272.225
		2				1.75439	9.23804	297.05
		3							2.05128	8.38245	248.25
		4							3.07692	13.845	262
Aug	30	0
Sep	25	0
Oct	22	0
Nov	25	0
Dec	25	0
Jan2010	20	0
Feb	25	0
Mar	28	0
Apr	27	1	0.854701	0.0728248	35
		2	0.3663	0.0754808	64
		3	0.3663	0.13376	75
		4	0.3663	0.0277875	42
		5	0.512821	0.104868	62
		6	0.3663	0.0158786	23
May	30	1	2.5641	0.0211427	27.4
		2	5.12821	0.0815504	15	7.69231	1.50931	165.333
		3	51.2821	0.627265	14.08	7.69231	2.34472	150.333
		4	7.69231	0.0965315	15.0667	5.12821	0.282225	131.25
		5	15.3846	0.0846614	14.6	5.12821	0.315187	146.5
		6	7.69231	0.0971557	14.8333
		7	4.2735	0.0271835	9
		8	5.12821	0.0573873	14.25	2.5641	2.24294	149.5
		9	6.41026	0.0666538	14.6
		10	15.3846	0.086383	13
		11	7.69231	0.0825572	13.6667	2.5641	1.27782	122
		12	51.2821	0.369695	12
Jun	30	1	4.2735	0.804429	51
		2	4.2735	0.721536	50
		3	12.8205	0.16472	14.08
		4	6.41026	0.0719858	13
		5	9.61538	0.117795	13
		6	11.1111	0.539642	25
		7	10.8974	0.195117	19
		8	6.41026	1.10395	51
		9	7.69231	0.205386	20
		10	17.094	0.696299	26
		11	17.9487	1.55328	38
		12	17.094	2.58364	47
		13	10.8974	0.513465	25
		14	13.4615	0.744223	32
		15	12.8205	0.577195	26	5.12821	18.7169	258.375
		16	11.5385	1.07319	27.5	3.4188	12.1926	317
		17				5.12821	19.9475	291.75
		18				2.5641	9.30797	264.5	1.92308	1.14688	300.333
		19							1.7094	3.06063	315.5
Jul	30	1	52.9915	0.0563805	14
		2	31.6239	0.26821	12
		3	46.1538	0.358822	11
		4	28.2051	0.21928	11
		5	11.5385	1.32245	70.25
		6	10.2564	0.22074	46.125
		7				3.4188	22.3852	326.75
		8				2.5641	11.9272	281.5
		9				1.92308	8.04139	275.333
		10				5.12821	28.5409	319.75
		11				5.12821	34.7029	378
		12							11.1111	9.367	338.138
		13							28.2051	9.0797	252.4
		14							9.40171	3.46599	283.518
		15							1.7094	1.26333	329.3
		16							8.97436	2.98513	243.286
		17							11.1111	53.6461	342.308
Aug	30	0
Sep	30	0
Oct	30	0
Nov	25	0
Dec	25	0
Jan2011	25	0
Feb	20	0
Mar	25	0

## Sheet: Phorbas tenacior
Month	N	ind in repro	n sperm/mm2	Inv sperm %	diam sperm (µm)	n oocy/mm2	Inv oocy %	diam oocy (µm)	n embry/mm2	Inv embry %	diam embry (µm)	n larva/mm2	Inv larva %	diam larva (µm)		Month	N for diametre
Mar2009	30	0															sperm	oocyte	embryo	larvae
Apr	22	1				3.85	0.03	22.6633								Apr09		11
		2				3.21	0.09	20.68								May		11
May	25	1				3.85	0.16	24.6983								Jun	200		4
		2				3.21	0.12	22.63								Jul			57
Jun	22	1	51.92	1.72	22.1537				1.7094	2.34632	144.5					Aug			22	9
		2	25	0.53	17.9795											Sep				9
		3	18.8	0.15	10.6364											Oct
		4	11.11	0.45	19.0769											Nov
		5	38.46	2.26	29.6244											Dec
Jul	22	1							4.49	10.43	209.714					Jan2010
		2							5.13	11.94	230.666					Feb
		3							3.85	5.38	183.833					Mar
		4							5.76923	10.4362	199.111					Apr
		5							6.41026	4.15405	246.7					May		7
		6							7.69231	1.67782	238.556					Jun			8
		7							8.54701	10.2573	171.2					Jul			16
Aug	17	1							2.564	2.536	138					Aug	19		18	10
		2							1.923	2.608	203.667					Sep			4	5
		3							3.419	0.491135	167					Oct
		4							2.564	4.833	248					Nov
		5							3.419	4.75948	234					Dec
		6							1.923	4.212	271					Jan2011
		7							1.282	1.933	216					Feb
		8							1.709	4.051	236					Mar
		9										7.692	20.277	194
		10										2.504	5.973	181.667
Sep	21	1										1.923	3.669	201
		2										0.855	0.959	188
		3										3.846	5.165	185
		4										1.709	2.777	195
Oct	25	0
Nov	22	0
Dec	30	0
Jan2010	30	0
Feb	25	0
Mar	20	0
Apr	30	0
May	30	1				2.56	0.07	18.5
		2				7.69	0.16	17
Jun	20	1							1.282	1.302	132
		2							3.846	6.786	201
		3							3.846	6.663	157
		4							1.282	3.988	233
Jul	11	1							0.855	4.027	275.6
		2							3.846	10.74	230
		3							1.923	11.9466	296
		4							2.564	7.94155	244.75
		5							0.641	2.691	289
		6							0.25	0.0347	209
Aug	20	1	6.41026	0.315832	29.8
		2	3.84615	0.17926	24.1667
		3	0.641026	0.0289957	18
		4	1.28205	0.0672539	19
		5							1.28205	6.80855	289
		6							3.84615	15.2224	247
		7							5.12821	11.8806	224
		8							1.28205	5.37991	292
		9							1.92308	6.0975	259
		10							1.28205	3.25683	203.5
		11							0.641026	3.60768	250
		12							1.28205	7.27913	300
Sep	20	1							1.28205	2.13179	230.5	3.84615	9.92076	201
		2							1.28205	3.81293	254	3.84615	9.87394	212.667
		3										5.12821	11.8842	182.5
		4										2.5641	7.26876	195.5
Oct	20	1										5.12821	10.7212	187
		2										3.84615	10.9611	231.667
Nov	28	0
Dec	30	0
Jan2011	30	0
Feb	25	0

## Sheet: Temperature
Month	Temperature
Mar2009	12.65
Apr	14.31
May	18.639
Jun	20.53
Jul	22.149
Aug	23.713
Sep	23.099
Oct	20.523
Nov	17.436
Dec	15.246
Jan2010	13.191
Feb	12.551
Mar	12.65
Apr	14.31
May	16.11
Jun	18.5
Jul	22.12
Aug	22.29
Sep	21.41
Oct	18.13
Nov	16.2
Dec	14.26
Jan2011	13.15
Feb	12.551
Mar	12.65
